# Supplementary material for: Characterization of the caprolactam degradation pathway in Pseudomonas jessenii using mass spectrometry-based proteomics
Source: PubMed Central journal article supplement (PMC6061476; doi:10.1007/s00253-018-9073-7), 2018-05-31
Supplement: 253_2018_9073_MOESM1_ESM.pdf [file 253_2018_9073_MOESM1_ESM.pdf]

## Supplementary data

Applied Microbiology and Biotechnology

### **Characterization of the caprolactam degradation pathway in *Pseudomonas jessenii* using mass spectrometry-based proteomics**

Marleen Otzen, Cyntia Palacio, Dick B. Janssen\*

Department of Biochemistry, Groningen Biomolecular Sciences and Biotechnology Institute,  
University of Groningen, The Netherlands

\*Corresponding author

Department of Biochemistry,  
Groningen Biomolecular Sciences and Biotechnology Institute,  
University of Groningen,  
Nijenborgh 4,  
9747 AG Groningen,  
The Netherlands

E-mail: [d.b.janssen@rug.nl](mailto:d.b.janssen@rug.nl)

Fax: 0031 50 36 34165

Phone: 0031 50 35 34008.

**Table S1:** Protein abundances in cell free extracts of caprolactam-grown *P. jessenii* cells determined by LC-MS/MS.

| ORF      | Mass   | Database source             | Sequence coverage (average) | Total spectrum count (average) | iBAQ (average) | iBAQ_log2 (average) |
|----------|--------|-----------------------------|-----------------------------|--------------------------------|----------------|---------------------|
| ORF 4270 | 76 kDa | fig 66666666.92865.peg.4270 | 0.39                        | 102                            | 5.40E+08       | 29.01               |
| ORF 4271 | 63 kDa | fig 66666666.92865.peg.4271 | 0.319                       | 41.8                           | 4.08E+08       | 28.61               |
| ORF 4266 | 50 kDa | fig 66666666.92865.peg.4266 | 0.219                       | 16                             | 7.12E+07       | 25.15               |
| ORF 2532 | 37 kDa | fig 66666666.92865.peg.2532 | 0.20                        | 8.6                            | 5.99E+07       | 25.83               |
| ORF 4278 | 41 kDa | fig 66666666.92865.peg.4278 | 0.24                        | 9                              | 5.86E+07       | 25.75               |
| ORF 1114 | 40 kDa | fig 66666666.92865.peg.1114 | 0.25                        | 10.6                           | 6.14E+07       | 25.73               |
| ORF 3301 | 13 kDa | fig 66666666.92865.peg.3301 | 0.16                        | 1.8                            | 5.80E+07       | 25.72               |
| ORF 4265 | 52 kDa | fig 66666666.92865.peg.4265 | 0.19                        | 12.4                           | 3.92E+07       | 25.13               |
| ORF 4282 | 42 kDa | fig 66666666.92865.peg.4282 | 0.12                        | 6.4                            | 3.12E+07       | 24.85               |
| ORF 1056 | 40 kDa | fig 66666666.92865.peg.1056 | 0.18                        | 6.6                            | 2.82E+07       | 24.73               |
| ORF 4187 | 49 kDa | fig 66666666.92865.peg.4187 | 0.079                       | 4                              | 1.91E+07       | 24.18               |
| ORF 4279 | 55 kDa | fig 66666666.92865.peg.4279 | 0.096                       | 3.8                            | 1.75E+07       | 24.06               |
| ORF 4150 | 77 kDa | fig 66666666.92865.peg.4150 | 0.15                        | 8.8                            | 1.69E+07       | 23.99               |
| ORF 3044 | 38 kDa | fig 66666666.92865.peg.3044 | 0.14                        | 3.8                            | 1.45E+07       | 23.66               |
| ORF 3504 | 74 kDa | fig 66666666.92865.peg.3504 | 0.062                       | 4                              | 7.85E+06       | 22.90               |
| ORF 4277 | 44 kDa | fig 66666666.92865.peg.4277 | 0.073                       | 2.8                            | 7.12E+06       | 22.76               |
| ORF 5740 | 30 kDa | fig 66666666.92865.peg.5740 | 0.11                        | 6.8                            | 6.46E+06       | 22.53               |

Values represent average characteristics of all identified protein. This data is based on 2 independent replicate cultures, analyzed in duplo or triplo by LC-MS/MS. None of these hits was detectable in glucose-grown cells.

**Table S2:** Difference in iBAQ-log<sub>2</sub> protein level in caprolactam-grown cells compared to glucose/ammonium sulfate-grown cells.

|          | iBAQ Cap/iBAQ gluc |
|----------|--------------------|
| ORF 4270 | 3.41               |
| ORF 4271 | 3.37               |
| ORF 4266 | 2.96               |
| ORF 2532 | 3.04               |
| ORF 4278 | 3.03               |
| ORF 1114 | 3.03               |
| ORF 3301 | 3.03               |
| ORF 4265 | 2.96               |
| ORF 4282 | 2.92               |
| ORF 1056 | 2.91               |
| ORF 4187 | 2.84               |
| ORF 4279 | 2.83               |
| ORF 4150 | 2.82               |
| ORF 3044 | 2.78               |
| ORF 3504 | 2.69               |
| ORF 4277 | 2.68               |
| ORF 5740 | 2.65               |
